# Supplementary material for: Discovery and Biochemical Characterization of PlyP56, PlyN74, and PlyTB40—Bacillus Specific Endolysins
Source: PubMed Central journal article supplement (PMC5977269; doi:10.3390/v10050276), 2018-05-21
Supplement: viruses-10-00276-s001.pdf [file viruses-10-00276-s001.pdf]

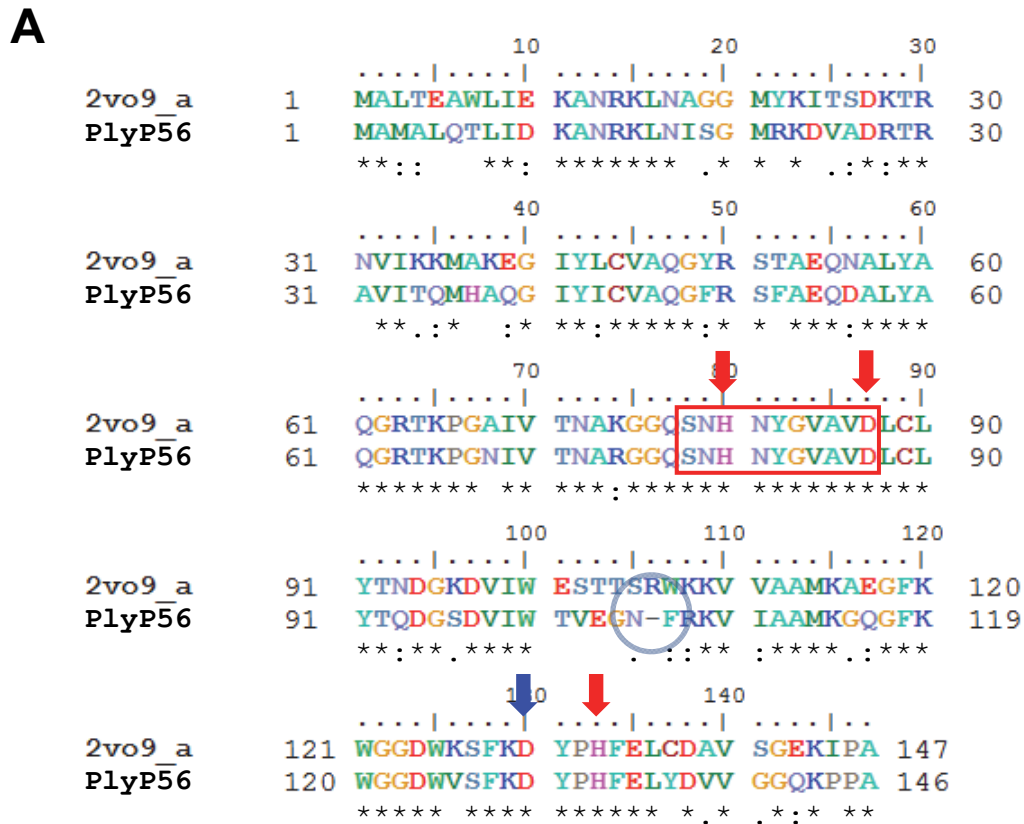

**B**

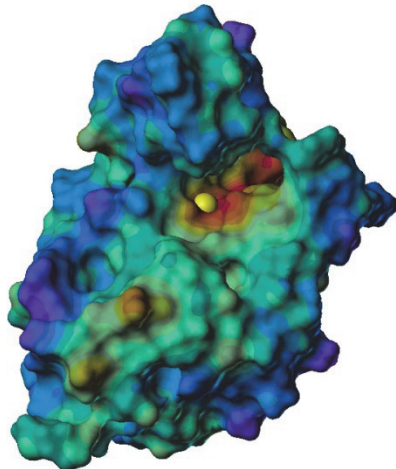

**C**

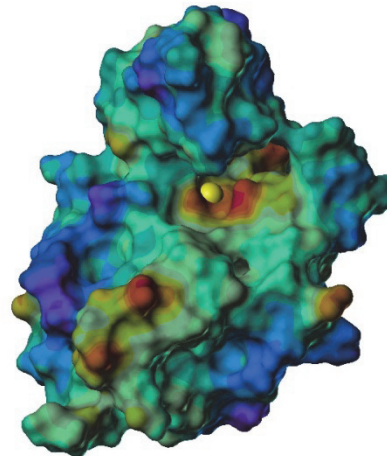

**Figure S1. PlyP56 alignment with structural homolog Ply500.** (A) Sequence alignment of *L. monocytogenes* phage A500 (Ply500) from PDB entry 2VO9 and PlyP56 EADs (Clustal X alignment symbols: asterisk = identical; colon = strongly similar; period = weakly similar; space = not similar). Overall percent identity ( $\# \text{ identical} / \# \text{ total}$ ) = 70.1%; percent similarity [ $(\# \text{ identical} + \# \text{ strongly similar}) / \# \text{ total}$ ] = 81.6%. Arrows indicate the metal-binding residues (red) and the catalytic base/acid (blue). The conserved SxHxxGxAxD zinc-binding motif is highlighted with a red rectangle. Colored ovals represent sequence insertions or deletions; see Fig. 5. (B–C) Connolly surfaces color-coded by electrostatic potential (blue = most positive; red = most negative) for the template Ply500 (B) and the modeled PlyP56 (C) EAD; a yellow sphere represents the  $\text{Zn}^{2+}$  ion.

**A**

|        |     |        |      |      |        |        |       |       |       |      |
|--------|-----|--------|------|------|--------|--------|-------|-------|-------|------|
|        |     |        | 10   | 20   | 30     |        |       |       |       |      |
| 1yb0_a | 1   | MEIRK  | KL   | VVP  | SKYGT  | KCPYT  | MKPKY | ITVHN | 30    |      |
| PlyN74 | 1   | MNINT  | QYLV | T    | DPERL  | KVINW  | MNPTE | ITFHN | 30    |      |
|        |     | *:*    | ..:  | :*   | .      | *      | *:*   | **:*  |       |      |
|        |     |        | 40   | 50   | 60     |        |       |       |       |      |
| 1yb0_a | 31  | TYNDAP | AE   | NE   | VNYMI  | TNNNE  | VSFH  | VA    | DDDK  | 60   |
| PlyN74 | 31  | TYNDAS | ASAE |      | VRNVR  | RNNSTG | TSFH  | TA    | VDDF  | 60   |
|        |     | *****  | .*   | *    | *.     | :      | .*    | ..    | ***.* | **** |
|        |     |        | 70   | 80   | 90     |        |       |       |       |      |
| 1yb0_a | 61  | QAIQG  | IP   | WER  | NAWAC  | GDGN-  | GPGN  | RES   | SISV  | 89   |
| PlyN74 | 61  | EVQQV  | VP   | FDR  | NAWHAG | DGTY   | GAGNR | NS    | IGV   | 90   |
|        |     | ..*    | :    | ***: | *      | ***.   | *     | ***:  | **.*  |      |
|        |     |        | 100  | 110  | 120    |        |       |       |       |      |
| 1yb0_a | 90  | EICYS  | KS   | GGD  | RYYKA  | ENNAV  | DVVR  | QL    | MSMY  | 119  |
| PlyN74 | 91  | EICYS  | MS   | GGE  | RYRKA  | EELNAI | EHIS  | DL    | LMVRF | 120  |
|        |     | *****  | ***: | **   | ***    | **:    | :     | :     | **    | :    |
|        |     |        | 130  | 140  | 150    |        |       |       |       |      |
| 1yb0_a | 120 | NIPIE  | NR   | TH   | QSWSG  | KYCPH  | RMLAE | GR    | WGWA  | 149  |
| PlyN74 | 121 | GIPIS  | KV   | KTH  | QERN   | GKYCPH | RMLDE | GR    | VGVW  | 150  |
|        |     | .*     | ..:  | **:  | *      | ..*    | ***** | ***   | ***   | *    |
|        |     |        | 150  | 155  |        |        |       |       |       |      |
| 1yb0_a | 150 | FIQK   | VK   |      |        |        | 155   |       |       |      |
| PlyN74 | 151 | FKAE   | CE   |      |        |        | 156   |       |       |      |
|        |     | *      | :    | :    |        |        |       |       |       |      |

**B**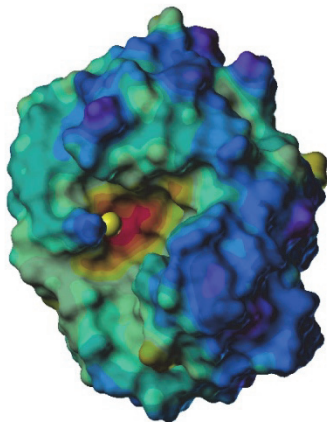**C**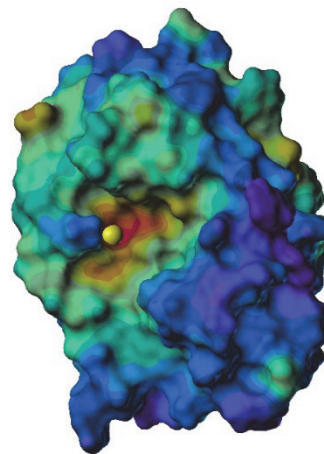

**Figure S2. PlyN74 alignment with structural homolog PlyL.** (A) Sequence alignment of *B. anthracis*  $\lambda$  prophage Ba02 (PlyL) from PDB entry 1YB0 and PlyN74 EADs (Clustal X alignment symbols: asterisk = identical; colon = strongly similar; period = weakly similar; space = not similar). Overall percent identity ( $\#$  identical /  $\#$  total) = 51.3%; percent similarity [ $(\#$  identical +  $\#$  strongly similar) /  $\#$  total] = 64.1%. Arrows indicate the metal-binding residues (red) and the catalytic base/acid (blue). Colored ovals represent sequence insertions or deletions; see Fig. 5. (B–C) Connolly surfaces color-coded by electrostatic potential (blue = most positive; red = most negative) for the template PlyL (B) and the modeled PlyN74 (C) EAD; a yellow sphere represents the  $Zn^{2+}$  ion.

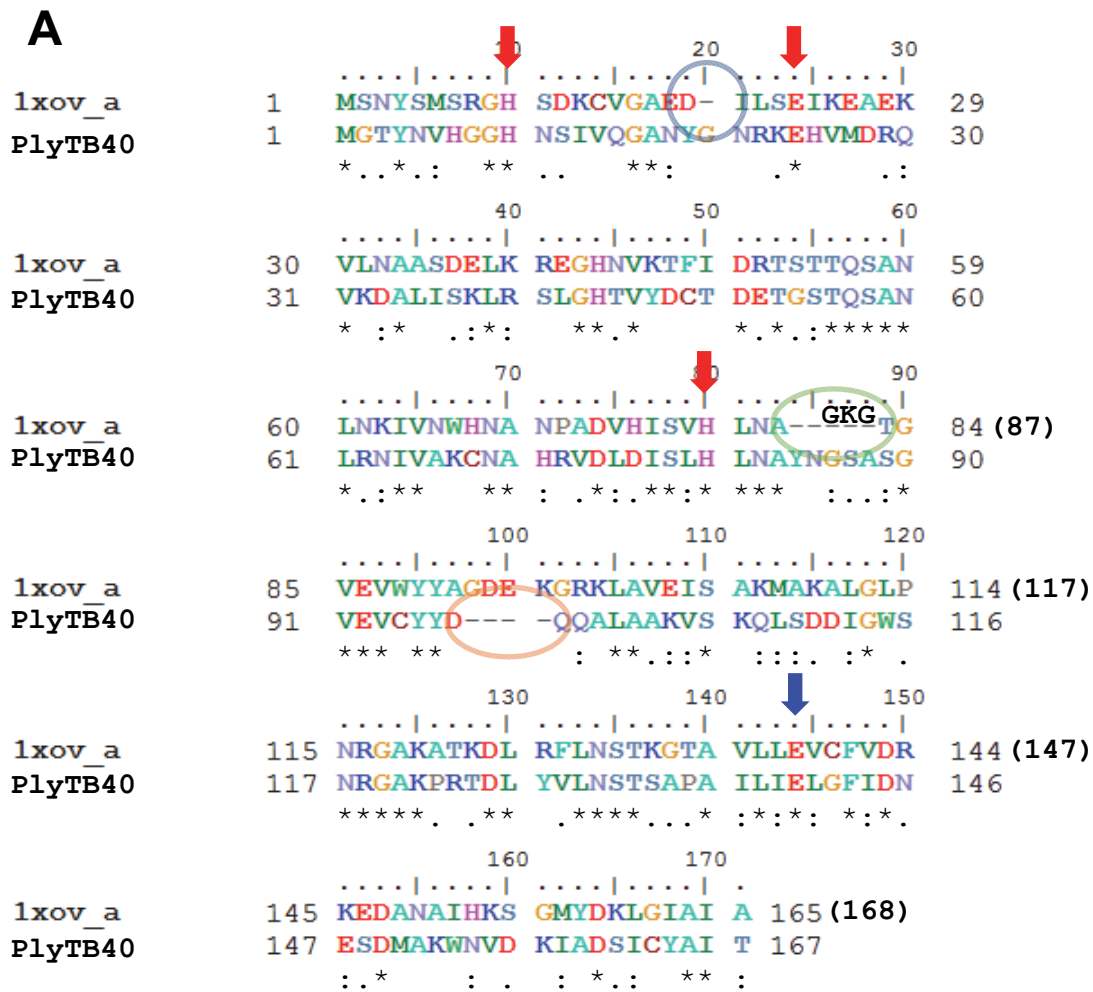

**B**

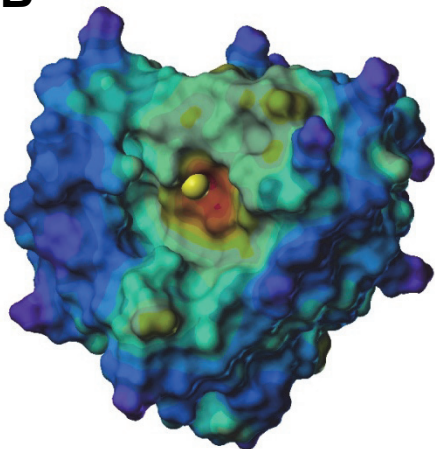

**C**

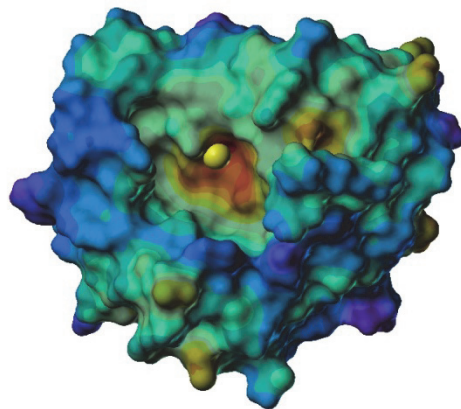

**Figure S3. PlyTB40 alignment with structural homolog PlyPSA.** (A) Sequence alignment of *L. monocytogenes* phage PSA (PlyPSA) from PDB entry 1XOV and PlyTB40 EADs (Clustal X alignment symbols: asterisk = identical; colon = strongly similar; period = weakly similar; space = not similar). Overall percent identity (# identical / # total) = 36.3%; percent similarity [(# identical + # strongly similar) / # total] = 53.2%. Arrows indicate the metal-binding residues (red) and the catalytic base/acid (blue). Colored ovals represent sequence insertions or deletions; see Fig. 5. (B–C) Connolly surfaces color-coded by electrostatic potential (blue = most positive; red = most negative) for the template PlyPSA (B) and the modeled PlyTB40 (C) EAD; a yellow sphere represents the Zn<sup>2+</sup> ion.

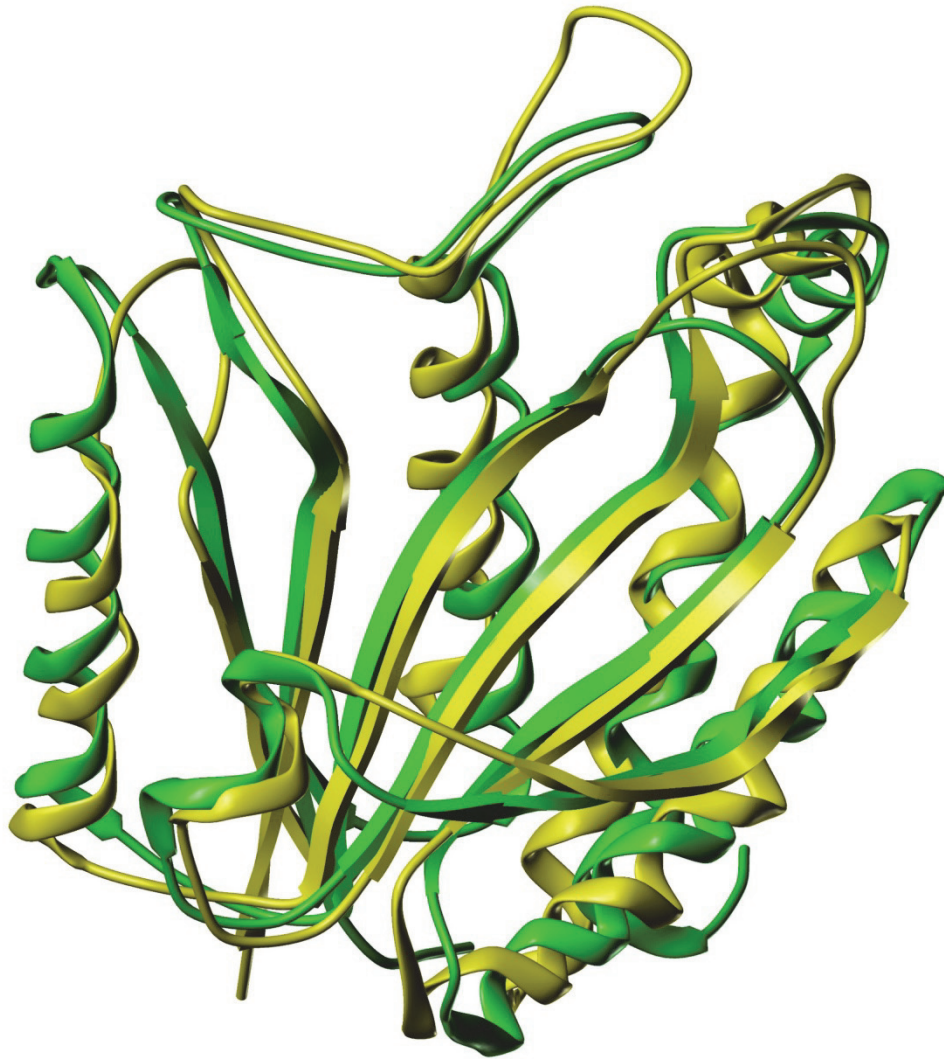

**Figure S4. Carboxypeptidase T-type Amidase\_3 fold.** Ribbon diagrams of the endolysin EADs of *Listeria monocytogenes* bacteriophage PlyPSA (PDB ID: 1XOV; PlyTB40 homology modeling template; green) and *Bacillus polymyxa* var. *colistinus* CwIV (PDB ID: 1JWQ; yellow), each exhibiting the carboxypeptidase T-type Amidase\_3 fold.

## Supplementary Material

**Table S1: Primers used in this study**

| Template                | Primer  | Sequence (5' > 3')*                                                  |
|-------------------------|---------|----------------------------------------------------------------------|
| pBAD24:: <i>plyP56</i>  | IR29 F' | CGT <u>GAATTC</u> CATGCATCATCATCATCATGATTATGATA<br>GCAGCTGG          |
|                         | IR30 R' | CGT <u>TCTAGAT</u> TATTTAAACGTGCCCCAATA                              |
| pBAD24:: <i>plyN74</i>  | IR33 F' | CGT <u>GAATTC</u> CATGCATCATCATCATCATGATTATGATA<br>GCAGCTGGTTTACC    |
|                         | IR34 R' | CGT <u>TCTAGAT</u> TATTTAAAGGTGCCCCAATAATTCAC                        |
| pBAD24:: <i>plyTB40</i> | IR37 F' | CGT <u>GAATTC</u> CATGCATCATCATCATCATCATTATGATAGCA<br>GCTGGTTTACACCG |
|                         | IR38 R' | CGT <u>TCTAGAT</u> TACTGAAAGGTGCCCCAATAGCTAAT                        |

\* Restriction sites underlined
